# Supplementary material for: Large-scale genome-wide study reveals climate adaptive variability in a cosmopolitan pest
Source: PubMed Central journal article supplement (PMC8664911; doi:10.1038/s41467-021-27510-2), 2021-12-10
Supplement: 41467_2021_27510_MOESM1_ESM.pdf [file 41467_2021_27510_MOESM1_ESM.pdf]

**Supplementary information for**  
**Large-scale genome-wide study reveals climate adaptive variability**  
**in a cosmopolitan pest**

Yanting Chen<sup>1,2,3,4</sup>, Zhaoxia Liu<sup>1,2,3,5</sup>, Jacques Régnière<sup>6</sup>, Liette Vasseur<sup>1,2,7</sup>, Jian Lin<sup>8</sup>,  
Shiguo Huang<sup>8</sup>, Fushi Ke<sup>1,2,3,9</sup>, Shaoping Chen<sup>1,2,3,4</sup>, Jianyu Li<sup>1,2,3,4</sup>, Jieling Huang<sup>1,2,3</sup>,  
Geoff M. Gurr<sup>1,2,10\*</sup>, Minsheng You<sup>1,2,3\*</sup>, Shijun You<sup>1,2,3\*</sup>

## Supplementary Figures and Tables

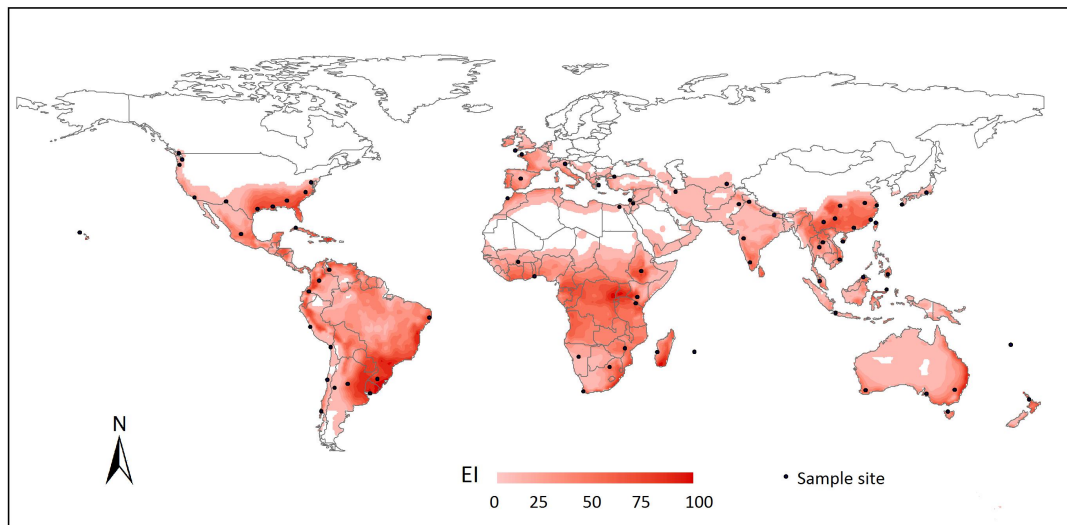

**Supplementary Figure 1. Map of sampling sites showing the locations where specimens were collected (see Supplementary Data 1 for details) across year-round persistence regions of diamondback moth in the world.** A total of 372 specimens were collected from 78 sampling sites in the year-round persistence regions of diamondback moth across the world, with 13 samples from Africa, 29 from Asia, 5 from Europe, 13 from North America including Hawaii, 12 from South America, and 6 from Oceania. The red-shaded range represents the year-round persistence regions of diamondback moth ( $EI > 0$ ).

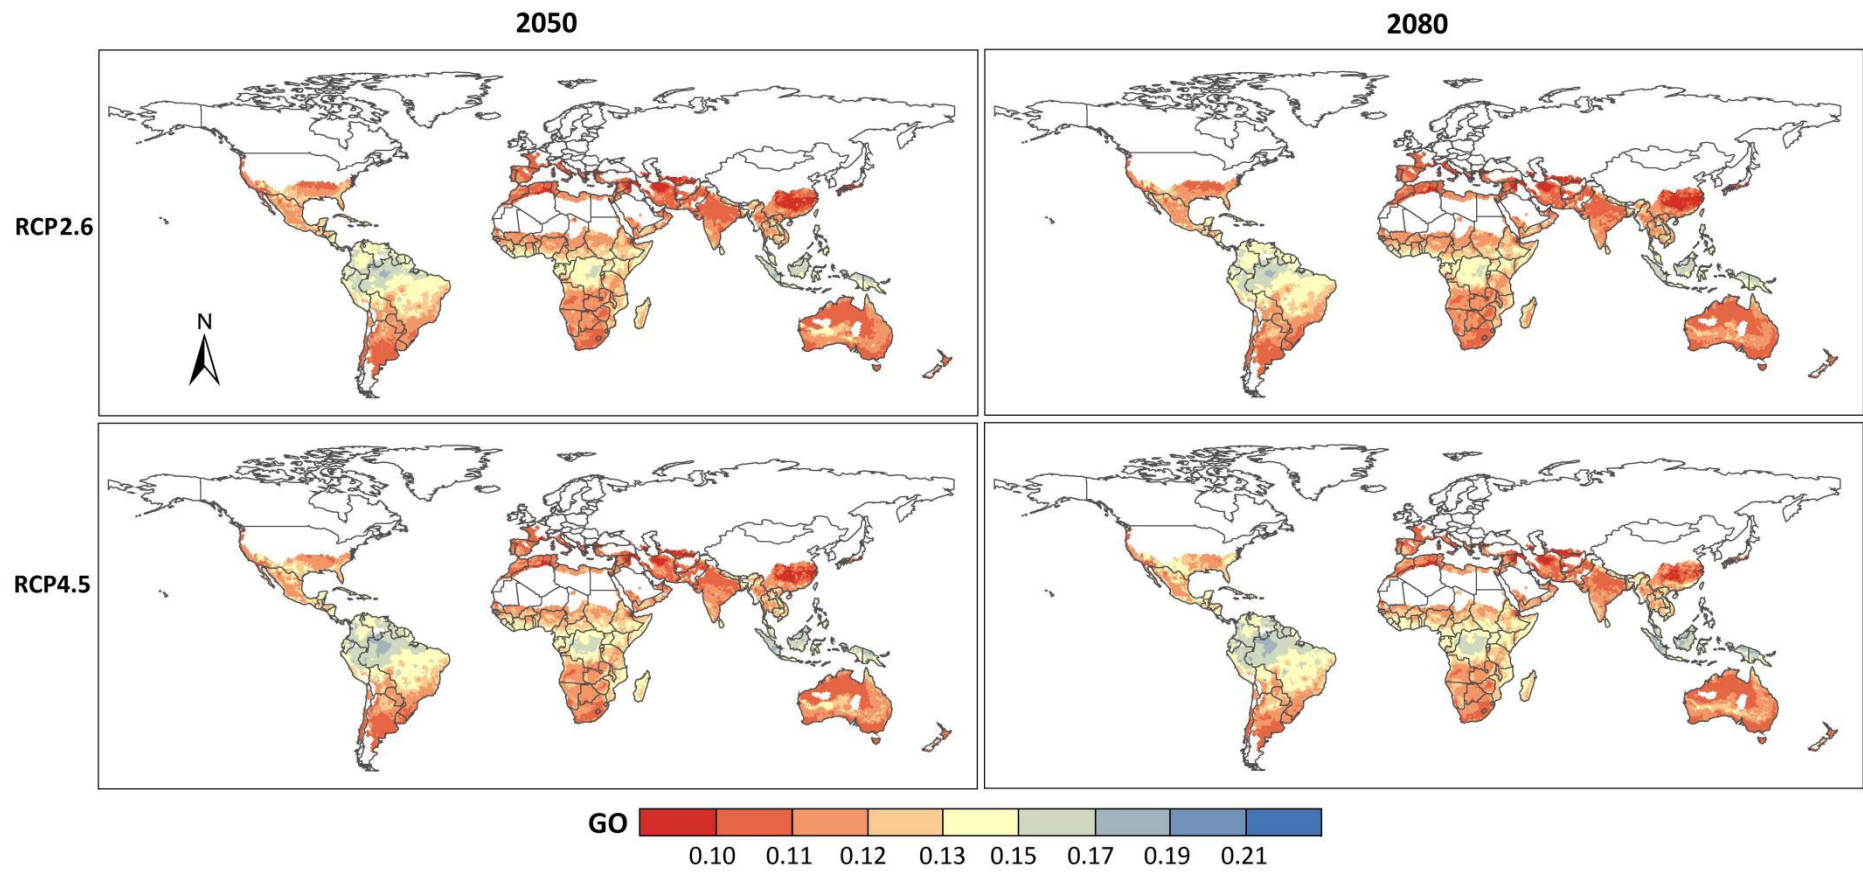

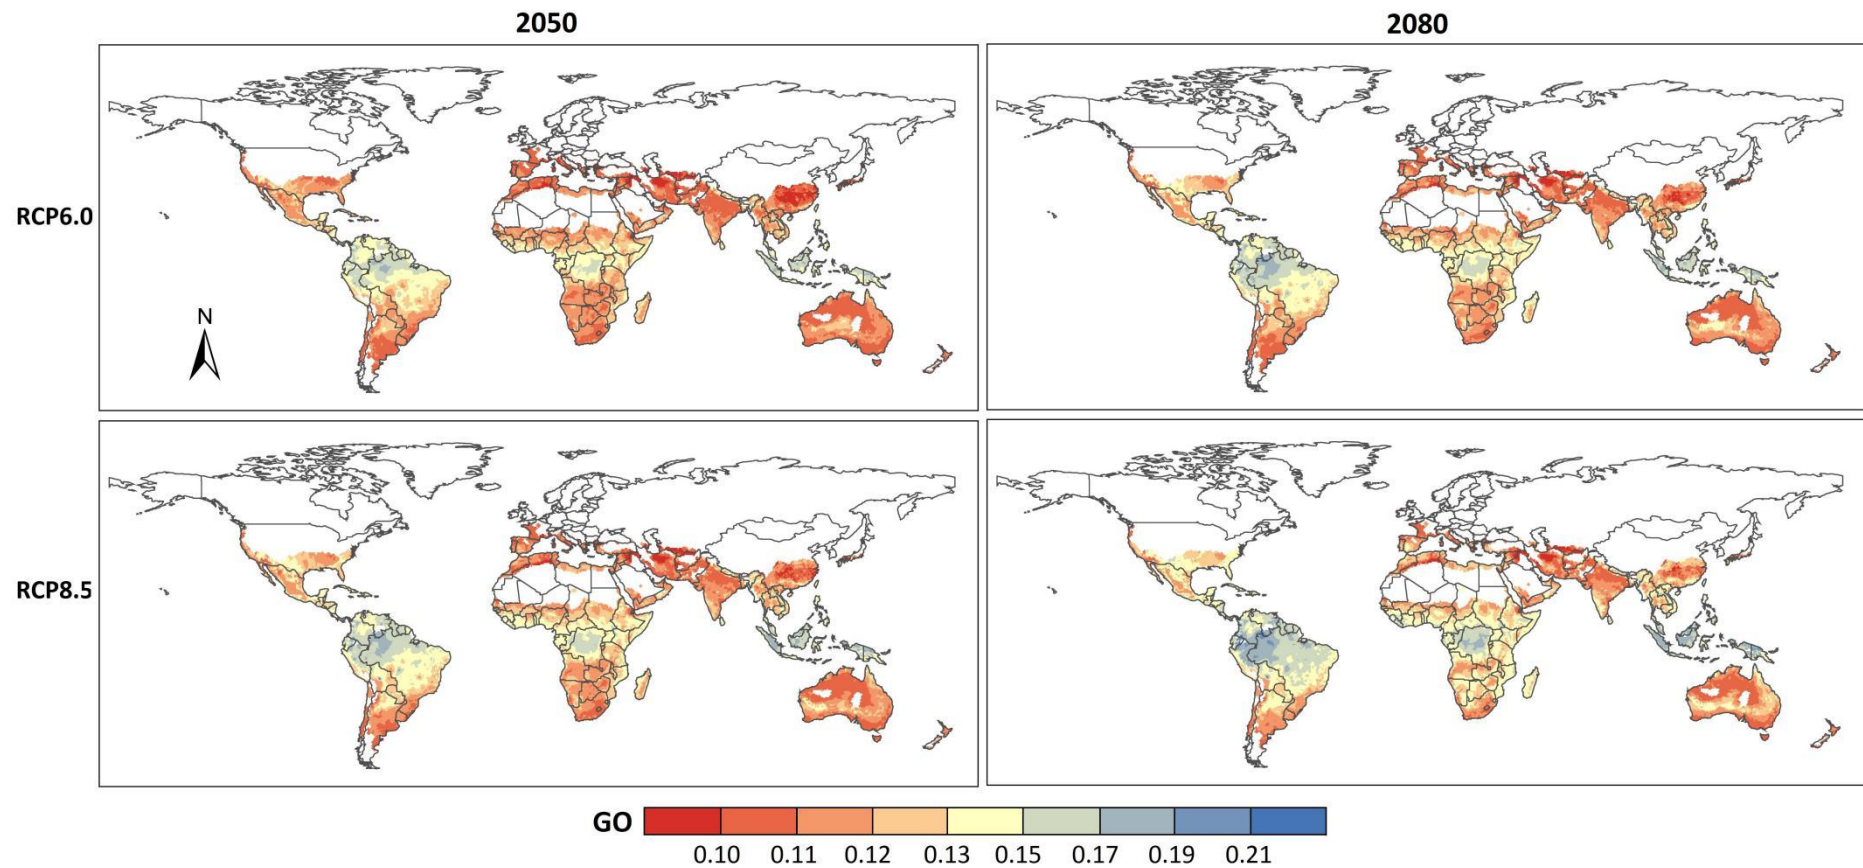

**Supplementary Figure 2. Predicted distribution of genetic offset (GO) under four projected greenhouse gas emission scenarios RCP2.6, RCP4.5, RCP6.0 and RCP8.5 in 2050 and 2080 based on generalized dissimilarity modelling (GDM).**

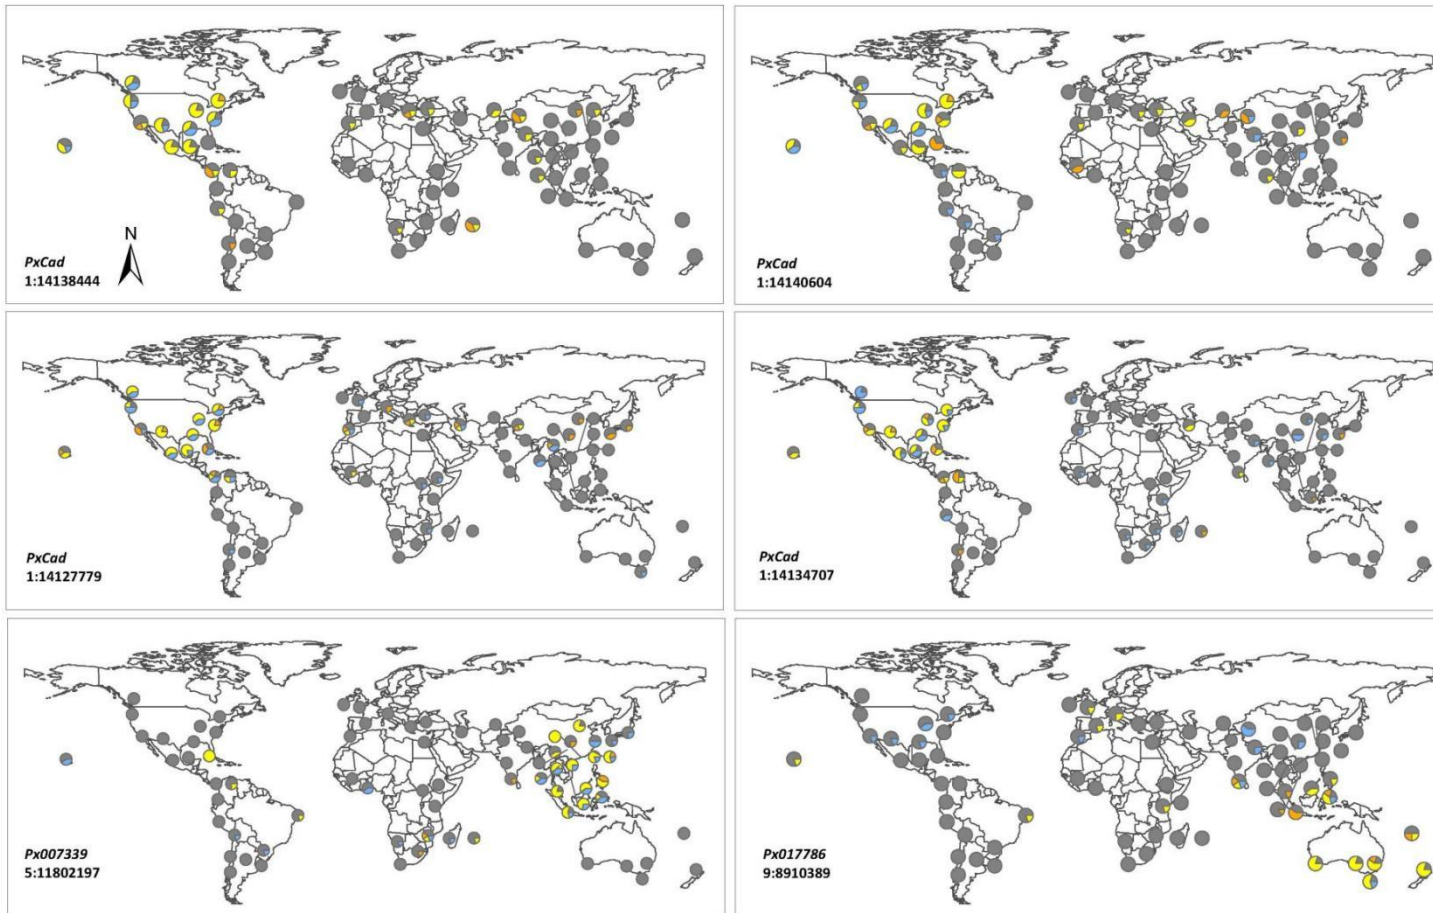

**Supplementary Figure 3. Genomic signals of adaptive selection shown by the frequency distribution of four SNPs identified from the coding region of *PxCad* and two SNPs associated with the two previously reported temperature-related genes (*Px007339* and *Px017786*). The colors represent: grey: original genotypes; yellow: homozygous mutants; orange: heterozygous mutants, and blue: missing sites, respectively.**

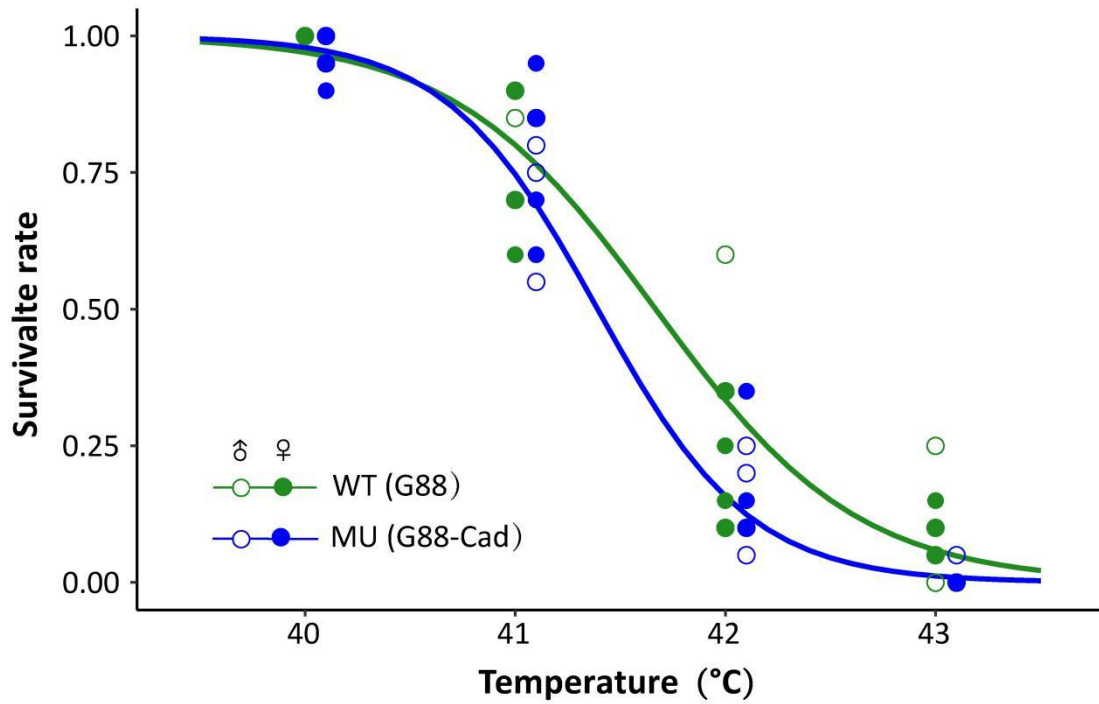

**Supplementary Figure 4. Relationship between survival rate and high temperatures using males and females of wild-type (WT, green) and *PxCad*-deficient (MU, blue) diamondback moth strains.** Dots represent observed survival of 20 individuals with four replicates for each of the treatments, and solid lines represent the fitted survival rates from the equations in Supplementary Table 4.



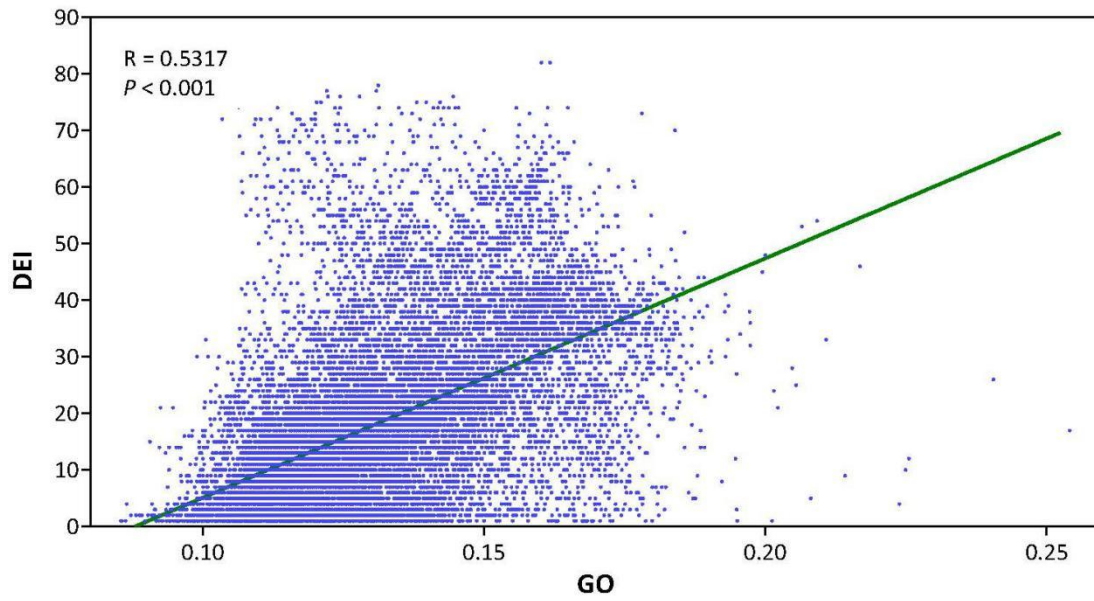

**Supplementary Figure 5. Correlation between GO and DEI based on the Pearson Correlation Coefficient.**

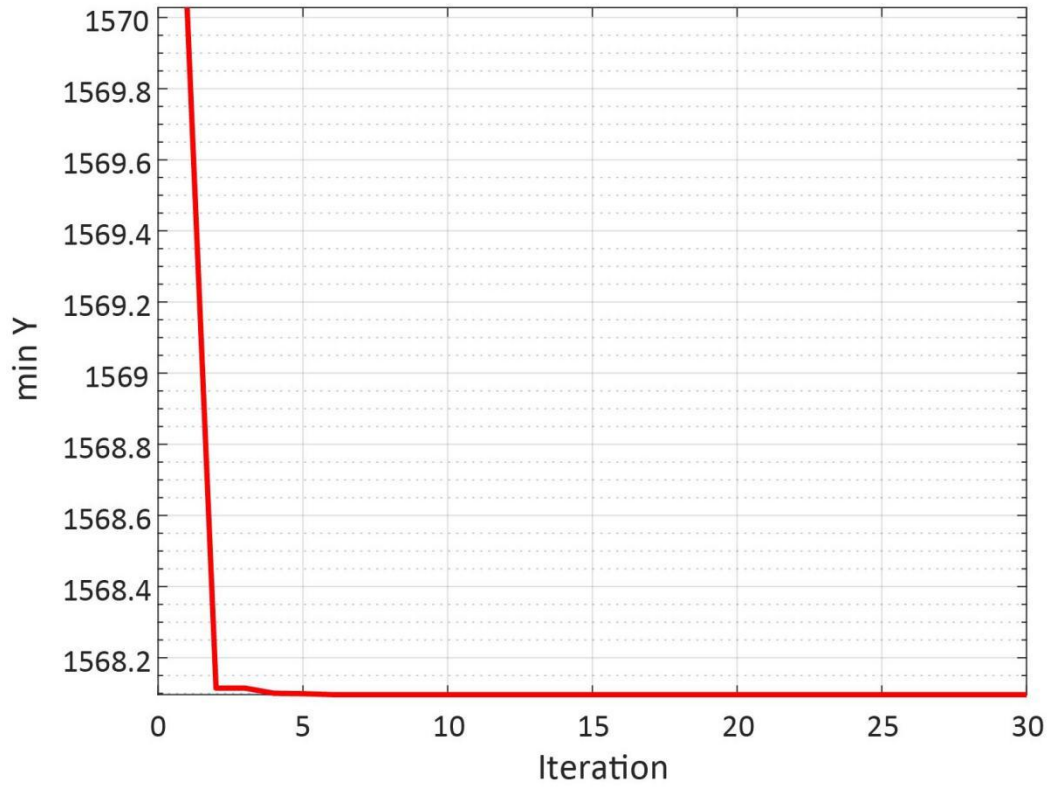

**Supplementary Figure 6. The convergence curve of the ABC algorithm.**



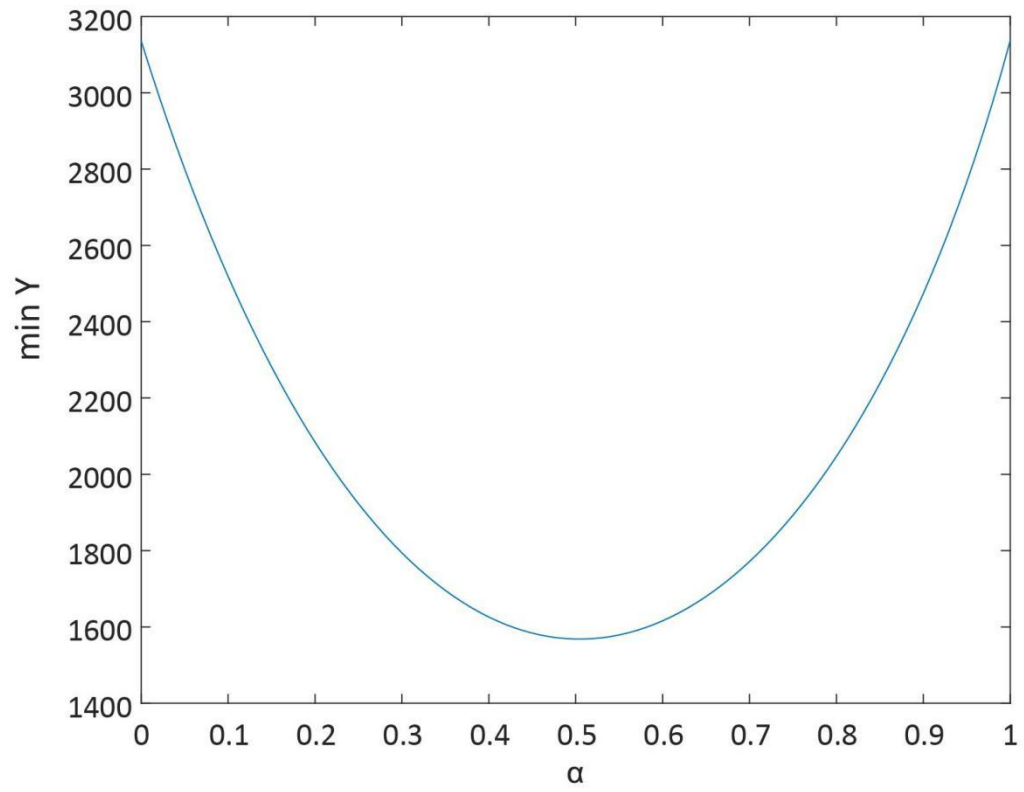

**Supplementary Figure 7. The function curve of  $\alpha$  and  $Y$ .**

**Supplementary Table 1. Summary of climate variables used for testing the correlations between genomic variation and climate conditions.**

| <b>Variables</b> | <b>Description</b>                                         |
|------------------|------------------------------------------------------------|
| Bio1             | Annual Mean Temperature                                    |
| Bio2             | Mean Diurnal Range (Mean of monthly (max temp - min temp)) |
| Bio3             | Isothermality (Bio2/Bio7) (* 100)                          |
| Bio4             | Temperature Seasonality (standard deviation *100)          |
| Bio5             | Max Temperature of Warmest Month                           |
| Bio6             | Min Temperature of Coldest Month                           |
| Bio7             | Temperature Annual Range (Bio5-Bio6)                       |
| Bio8             | Mean Temperature of Wettest Quarter                        |
| Bio9             | Mean Temperature of Driest Quarter                         |
| Bio10            | Mean Temperature of Warmest Quarter                        |
| Bio11            | Mean Temperature of Coldest Quarter                        |
| Bio12            | Annual Precipitation                                       |
| Bio13            | Precipitation of Wettest Month                             |
| Bio14            | Precipitation of Driest Month                              |
| Bio15            | Precipitation Seasonality (Coefficient of Variation)       |
| Bio16            | Precipitation of Wettest Quarter                           |
| Bio17            | Precipitation of Driest Quarter                            |
| Bio18            | Precipitation of Warmest Quarter                           |
| Bio19            | Precipitation of Coldest Quarter                           |

**Supplementary Table 2. Summary of the 94 putatively adaptive SNPs collectively detected by at least two of the three models (Samβada (S), LFMM (L), and Bayenv 2 (B)).**

| SNP         | Gene ID<br>(gene name)       | Genomic<br>region | Model    | bio1 | bio2      | bio3 | bio4 | bio5 | bio6 | bio7 | bio8 | bio9 | bio<br>10 | bio<br>11 | bio<br>12 | bio<br>13 | bio<br>14 | bio<br>15 | bio<br>16 | bio<br>17 | bio<br>18 | bio<br>19 | reference |
|-------------|------------------------------|-------------------|----------|------|-----------|------|------|------|------|------|------|------|-----------|-----------|-----------|-----------|-----------|-----------|-----------|-----------|-----------|-----------|-----------|
| 1:14140604  | Px012847<br>( <i>PxCad</i> ) | Exon              | S, L, B* |      | △○□<br>** |      |      |      |      | □    |      |      |           |           |           |           |           |           |           |           |           |           |           |
| 1:14138444  |                              |                   | S, L, B  |      | △○□       |      |      |      | □    |      |      |      |           |           |           |           |           |           |           |           |           |           |           |
| 8:17959406  | -                            | Intergenic        | S, L, B  |      | △□        |      |      |      | □    | □    | ○    |      | △         |           |           |           |           |           |           |           |           |           |           |
| 17:4166692  | -                            | Intergenic        | S, L, B  |      | △○□       |      |      |      |      | △    |      |      |           |           |           |           |           |           |           |           |           |           |           |
| 1:19367073  | -                            | Intergenic        | S, L, B  |      | ○         |      |      | △    | □    | □    |      |      |           | □         |           |           |           |           |           |           |           |           |           |
| 1:14127779  | Px012847                     | Exon              | S, B     |      | □         |      |      |      |      | △    |      |      |           |           |           |           |           |           |           |           |           |           |           |
| 1:14134707  | Px012847                     | Exon              | S, B     |      | △□        |      |      |      |      |      |      |      |           |           |           |           |           |           |           |           |           |           |           |
| 13:6927806  | Px006020                     | Exon              | S, B     |      |           | △□   |      |      | □    |      | □    |      |           | □         | □         | □         |           |           |           | □         |           |           |           |
| 5:11815334  | Px007340                     | Exon              | S, B     | □    |           |      |      |      | △□   | □    |      |      |           | □         |           |           |           |           |           |           |           |           |           |
| 5:6973906   | Px005423                     | Exon              | S, B     |      |           |      |      |      |      |      | □    |      |           |           |           | □         |           |           |           | □         |           | □         |           |
| 6:13269140  | Px014654                     | Exon              | S, B     | □    |           |      |      |      |      |      |      |      |           | □         |           | □         |           |           |           | □         |           |           |           |
| 9:5341286   | Px005767                     | Exon              | S, B     |      |           |      |      | △    |      |      |      |      | △         |           |           |           |           |           |           |           |           |           |           |
| 1:1357238   | Px003712                     | Exon              | S, B     |      |           |      |      | △    |      |      |      |      | △         |           |           |           |           |           |           |           |           |           | □         |
| 1:18271204  | Px005886                     | Exon              | S, B     |      |           |      |      | △□   |      |      |      |      | □         |           |           |           |           |           |           |           |           |           |           |
| 17:15419750 | Px012020                     | Exon              | S, B     |      |           |      |      |      |      |      | □    |      |           |           |           |           |           |           |           |           |           | □         |           |
| 5:11802197  | Px007339                     | Exon              | S, B     | □    |           |      |      |      | △□   |      | □    |      |           | □         |           |           |           |           |           |           |           |           |           |
| 5:6965337   | Px005422                     | Exon              | S, B     |      |           |      |      |      |      |      | □    |      |           |           |           | □         |           |           |           | □         |           | □         |           |
| 1:1357580   | Px003712                     | Exon              | S,B      |      |           |      |      | △    |      |      |      |      | △         |           |           |           |           |           |           |           |           |           |           |
|             |                              |                   |          |      |           |      |      |      |      |      |      |      | □         |           |           |           |           |           |           |           |           |           |           |

| SNP         | Gene ID<br>(gene name) | Genomic<br>region | Model | bio1 | bio2 | bio3 | bio4 | bio5 | bio6 | bio7 | bio8 | bio9 | bio<br>10 | bio<br>11 | bio<br>12 | bio<br>13 | bio<br>14 | bio<br>15 | bio<br>16 | bio<br>17 | bio<br>18 | bio<br>19 | reference |
|-------------|------------------------|-------------------|-------|------|------|------|------|------|------|------|------|------|-----------|-----------|-----------|-----------|-----------|-----------|-----------|-----------|-----------|-----------|-----------|
| 1:19322492  | Px005926               | Exon              | S,B   |      | △    |      |      |      | □    | □    |      |      |           |           |           |           |           |           |           |           |           |           |           |
| 13:1607687  | Px005956               | Exon              | S,B   | □    |      |      |      | △    |      |      |      |      | △         | □         |           |           |           |           |           |           |           |           |           |
| 1:19166864  | Px005917               | Exon              | L, B  | ○    | □    |      |      |      | ○    | ○    | ○    |      |           | ○         |           |           |           |           |           |           |           |           |           |
| 1:19199374  | Px005920               | Exon              | L,B   | ○    | ○    |      | ○    |      | ○    | ○□   | ○    |      |           | ○         |           | ○         |           |           |           |           |           | ○         |           |
| 1:19321262  | Px005926               | Exon              | L,B   |      | ○□   |      | ○    |      | ○    | ○    |      |      |           | ○         |           |           |           |           |           |           |           |           |           |
| 11:14729263 | Px003623               | Exon              | L,B   |      |      |      |      |      |      |      |      |      |           |           | ○         |           | ○         |           |           |           |           | □         |           |
| 9:2482427   | Px016903               | Exon              | L,B   |      | ○□   |      |      |      |      |      |      |      |           |           |           |           |           |           |           |           |           |           |           |
| 9:143305    | Px016688               | Intron            | S, L  |      | △    |      |      |      |      |      | ○    |      | △         |           |           |           |           |           |           |           |           |           |           |
| 11:17356902 | Px004050               | Intron            | S, B  |      |      |      |      | △    |      |      | □    |      | △         | □         |           |           |           |           |           |           |           |           |           |
| 5:11842782  | Px007342               | Intron            | S, B  | □    |      |      | □    |      | □    | □    | □    |      |           | □         |           |           |           |           |           |           |           |           |           |
| 5:11845554  | Px007342               | Intron            | S, B  | □    |      |      |      |      | △□   | □    | □    |      |           | □         |           |           |           |           |           |           |           |           |           |
| 5:11848381  | Px007342               | Intron            | S, B  | △□   |      |      |      |      | □    | □    | □    |      |           | △         |           |           |           |           |           |           |           |           |           |
| 1:273656    | Px003665               | Intron            | S, B  |      |      |      | □    |      |      | △□   |      |      |           |           |           |           |           |           |           |           |           |           |           |
| 1:7225560   | Px003267               | Intron            | S,B   |      | △□   |      |      |      | □    | □    |      |      |           |           |           |           |           |           |           |           |           |           |           |
| 1:8077334   | Px003207               | Intron            | S,B   |      |      |      | △□   |      | □    | □    |      |      |           |           |           |           |           |           |           |           |           |           |           |
| 9:8910389   | Px017786               | Intron            | S,B   |      |      |      |      | △□   |      |      |      |      | △         |           |           |           |           |           |           |           |           |           | 3, 4      |
| 12:19772797 | Px005362               | Intron            | S,B   |      | △□   |      |      |      |      |      |      |      |           |           |           |           |           |           |           |           |           |           |           |
| 12:19777368 | Px005362               | Intron            | S,B   |      | △□   |      |      |      |      |      |      |      |           |           |           |           |           |           |           |           |           |           |           |
| 13:6930159  | Px006021               | Intron            | L, B  | □    |      | □    | ○    |      | ○    |      |      |      |           | ○         |           |           |           |           |           |           |           |           |           |
|             |                        |                   |       |      |      |      |      |      |      |      |      |      |           | □         |           |           |           |           |           |           |           |           |           |

| SNP         | Gene ID<br>(gene name) | Genomic<br>region | Model | bio1 | bio2 | bio3 | bio4 | bio5 | bio6 | bio7 | bio8 | bio9 | bio<br>10 | bio<br>11 | bio<br>12 | bio<br>13 | bio<br>14 | bio<br>15 | bio<br>16 | bio<br>17 | bio<br>18 | bio<br>19 | reference |
|-------------|------------------------|-------------------|-------|------|------|------|------|------|------|------|------|------|-----------|-----------|-----------|-----------|-----------|-----------|-----------|-----------|-----------|-----------|-----------|
| 3:2658494   | Px007104               | Intron            | L, B  |      |      |      |      |      |      |      |      |      |           |           |           |           | ○         |           |           | ○         |           |           |           |
|             |                        |                   |       |      |      |      |      |      |      |      |      |      |           |           |           |           | □         |           |           | □         |           |           |           |
| 1:14295167  | Px012858               | Intron            | L,B   | ○    | ○□   |      |      |      | ○    |      | ○    |      |           | ○         |           |           |           |           |           |           |           |           |           |
| 1:19193140  | Px005920               | Intron            | L,B   | ○    | ○□   |      | ○    |      | ○□   | ○    | ○    |      |           | ○         |           |           |           |           |           |           |           |           |           |
| 1:7176982   | Px003270               | Intron            | L,B   |      | ○□   |      |      |      |      | ○    |      |      |           |           |           |           |           |           |           |           |           |           |           |
| 6:5927131   | Px003314               | Intron            | L,B   | ○    |      | □    |      |      | ○    |      | ○    |      |           | ○         |           |           |           |           |           |           |           |           |           |
| 13:14488412 | -                      | Intergenic        | S, L  | ○    |      |      |      | △    |      |      | ○    |      | ○         |           |           |           |           |           |           |           |           |           |           |
| 1:3541169   | -                      | Intergenic        | S, L  |      | △    |      |      |      |      |      |      |      |           |           |           |           | ○         |           |           | ○         |           |           |           |
| 12:11605107 | -                      | Intergenic        | S, L  |      |      |      |      | △    |      |      |      |      | △         |           |           |           |           |           |           |           |           | ○         |           |
| 13:11552881 | -                      | Intergenic        | S, L  |      |      |      |      | △    |      |      |      |      | △         |           |           | ○         |           |           |           |           |           | ○         |           |
| 13:11552906 | -                      | Intergenic        | S, L  |      |      |      |      | △    |      |      |      |      | △         |           |           | ○         |           |           |           |           |           | ○         |           |
| 13:7756289  | -                      | Intergenic        | S, L  |      |      |      |      | △    | ○    |      |      |      | △         | ○         |           |           |           |           |           |           |           |           |           |
| 8:10036046  | -                      | Intergenic        | S, L  |      |      |      |      | △    |      |      |      |      |           |           |           | ○         |           |           |           |           |           |           |           |
| 12:1147665  | -                      | Intergenic        | S, B  | □    |      |      |      |      | △□   |      |      | □    | □         | △         |           |           |           |           |           |           |           |           |           |
|             |                        |                   |       |      |      |      |      |      |      |      |      |      |           | □         |           |           |           |           |           |           |           |           |           |
| 13:10703881 | -                      | Intergenic        | S, B  |      | △□   |      |      |      | □    | △    |      |      |           |           |           |           |           |           |           |           |           |           |           |
| 13:5359926  | -                      | Intergenic        | S, B  |      |      |      |      | △□   |      |      | □    |      | △         |           |           |           |           |           |           |           |           |           |           |
|             |                        |                   |       |      |      |      |      |      |      |      |      |      | □         |           |           |           |           |           |           |           |           |           |           |
| 16:19439907 | -                      | Intergenic        | S, B  |      |      |      |      | △□   |      |      |      |      | □         |           |           |           |           |           |           |           |           |           |           |
| 5:11820699  | -                      | Intergenic        | S, B  | □    |      |      |      |      | △□   | □    |      |      |           | □         |           |           |           |           |           |           |           |           |           |
| 5:11862353  | -                      | Intergenic        | S, B  | □    |      |      |      |      | □    |      |      |      |           | □         |           |           |           |           |           |           |           |           |           |
| 5:4410220   | -                      | Intergenic        | S, B  |      |      |      |      | △    |      |      |      |      |           |           | □         | □         |           |           | □         |           |           |           |           |
| 5:6971473   | -                      | Intergenic        | S, B  |      |      |      |      |      |      |      |      |      |           |           |           | △         |           |           | □         |           | □         |           |           |
|             |                        |                   |       |      |      |      |      |      |      |      |      |      |           |           |           | □         |           |           |           |           |           |           |           |

| SNP         | Gene ID<br>(gene name) | Genomic<br>region | Model | bio1 | bio2 | bio3 | bio4 | bio5 | bio6 | bio7 | bio8 | bio9 | bio<br>10 | bio<br>11 | bio<br>12 | bio<br>13 | bio<br>14 | bio<br>15 | bio<br>16 | bio<br>17 | bio<br>18 | bio<br>19 | reference |
|-------------|------------------------|-------------------|-------|------|------|------|------|------|------|------|------|------|-----------|-----------|-----------|-----------|-----------|-----------|-----------|-----------|-----------|-----------|-----------|
| 5:6971499   | -                      | Intergenic        | S, B  |      |      |      |      |      |      |      |      |      |           |           |           | □         |           |           | □         |           | □         |           |           |
| 5:6976799   | -                      | Intergenic        | S, B  | △    |      |      |      |      |      |      |      |      |           |           |           | □         |           |           | □         |           | □         |           |           |
| 9:3425415   | -                      | Intergenic        | S, B  | △    | □    |      |      |      |      |      |      |      |           |           |           |           |           |           |           |           |           |           |           |
| 10:9197738  | -                      | Intergenic        | S,B   |      | △□   |      |      |      |      |      |      |      |           |           |           |           |           |           |           |           |           |           |           |
| 13:7758227  | -                      | Intergenic        | S,B   |      |      |      |      | △□   |      |      |      |      | △<br>□    |           |           |           |           |           |           |           |           |           |           |
| 13:14452088 | -                      | Intergenic        | S,B   | □    |      |      |      | △    |      |      |      |      | △         |           |           |           |           |           |           |           |           |           |           |
| 13:6935702  | -                      | Intergenic        | L,B   | ○    |      |      |      |      | ○□   |      |      |      |           | ○         | ○         | ○         |           |           | ○         |           | ○         |           |           |
| 16:6153153  | -                      | Intergenic        | L,B   |      | ○□   |      |      |      |      | ○    |      |      |           |           |           |           |           |           |           |           |           |           |           |
| 16:6153291  | -                      | Intergenic        | L,B   |      | ○    |      |      |      |      |      |      |      |           |           |           | □         | □         |           | □         |           |           | ○         |           |
| 2:10846394  | -                      | Intergenic        | L,B   |      |      |      |      |      | ○    |      |      |      |           | ○         |           |           |           |           |           |           |           | □         |           |
| 6:5771117   | -                      | Intergenic        | L,B   | ○    |      |      |      |      | ○    |      | ○□   |      |           | ○         |           |           |           |           | ○         |           |           |           |           |
| 8:17771220  | -                      | Intergenic        | L,B   |      | ○□   |      |      |      |      |      |      |      |           |           |           |           |           |           |           |           |           |           |           |
| 8:17959823  | -                      | Intergenic        | L,B   | ○    | ○□   |      | ○    |      | ○    | ○    | ○    |      |           | ○         |           |           |           |           |           |           |           | ○         |           |
| 9:2414701   | -                      | Intergenic        | L,B   |      | ○□   |      |      |      | ○    | ○    |      |      |           |           |           |           |           |           |           |           |           |           |           |
| 9:2611378   | -                      | Intergenic        | L,B   |      | ○    |      |      |      | □    |      |      |      |           |           |           |           |           |           |           |           |           |           |           |
| 9:2628608   | -                      | Intergenic        | L,B   |      | ○    |      |      |      | ○□   | ○    |      |      |           |           |           |           |           |           |           |           |           |           |           |
| 8:5615011   | -                      | Intergenic        | L,B   |      |      |      |      | ○    |      |      |      |      |           |           |           | □         |           |           | □         |           |           |           | □         |
| 1:11336364  | -                      | Intergenic        | L, B  |      | ○    |      |      |      |      |      |      |      |           | □         |           |           |           |           |           |           |           |           |           |
| 1:19419094  | -                      | Intergenic        | L, B  | ○    | □    |      |      |      |      |      |      |      |           |           |           |           |           |           |           |           |           |           |           |
| 1:15128513  | -                      | Intergenic        | L,B   |      |      |      |      |      |      |      |      | ○□   |           | ○         |           |           |           |           |           |           |           |           |           |
| 1:19319356  | -                      | Intergenic        | L,B   |      | ○    |      |      |      | ○□   | ○    |      |      |           | ○<br>□    |           | ○         |           |           |           |           |           | ○         |           |

| SNP         | Gene ID<br>(gene name) | Genomic<br>region | Model | bio1 | bio2 | bio3 | bio4 | bio5 | bio6 | bio7 | bio8 | bio9 | bio<br>10 | bio<br>11 | bio<br>12 | bio<br>13 | bio<br>14 | bio<br>15 | bio<br>16 | bio<br>17 | bio<br>18 | bio<br>19 | reference |
|-------------|------------------------|-------------------|-------|------|------|------|------|------|------|------|------|------|-----------|-----------|-----------|-----------|-----------|-----------|-----------|-----------|-----------|-----------|-----------|
| 1:5621916   | -                      | Intergenic        | L,B   |      |      |      | □    |      |      |      |      |      |           |           | ○         | ○         |           |           | ○         |           |           | ○         |           |
| 1:7202452   | -                      | Intergenic        | L,B   |      | ○□   |      |      |      |      | ○    |      |      |           |           |           |           |           |           |           |           |           |           |           |
| 10:9198357  | -                      | Intergenic        | L,B   |      | □    |      |      |      | ○    |      |      |      |           |           |           |           |           |           |           |           |           |           |           |
| 11:3706230  | -                      | Intergenic        | L,B   | ○    |      |      |      |      | ○    |      |      |      |           | ○         |           |           |           |           |           |           |           |           |           |
| 11:7905763  | -                      | Intergenic        | L,B   |      |      | □    |      |      |      |      | ○    |      |           |           |           |           |           |           |           |           |           |           |           |
| 13:19137327 | -                      | Intergenic        | L,B   |      |      |      |      |      |      |      | □    |      |           |           |           |           |           |           |           |           |           | ○         |           |
| 13:6935544  | -                      | Intergenic        | L,B   | ○    |      | ○□   | ○□   |      | ○    | ○    | ○    |      |           | ○         | ○         |           |           |           |           |           |           |           |           |
| 1:19518653  | -                      | Intergenic        | L, B  | ○    | □    |      |      |      |      |      | ○    |      | ○         |           |           |           |           |           |           |           |           |           |           |
| 1:19544609  | -                      | Intergenic        | L, B  | □    | ○    |      |      |      | ○    | ○    |      |      |           |           |           |           |           |           |           |           |           |           |           |
| 10:9197915  | -                      | Intergenic        | L, B  | ○    |      |      |      |      | ○□   | □    | ○    |      |           | ○         |           |           |           |           |           |           |           |           |           |
| 13:6938168  | -                      | Intergenic        | L, B  | □    |      | □    | □    |      | □    | □    | ○□   |      |           | ○         |           |           |           |           |           |           |           |           |           |
| 13:6939736  | -                      | Intergenic        | L, B  |      |      | ○    | ○    |      |      | ○    | □    |      |           | ○         |           |           |           |           |           |           |           |           |           |
| 14:17278647 | -                      | Intergenic        | L, B  | □    | ○    |      |      |      | □    | □    |      |      |           | □         |           |           |           |           |           |           |           |           |           |
| 14:17288941 | -                      | Intergenic        | L, B  |      | ○□   |      |      |      |      | ○    |      |      |           |           | ○         | ○         |           |           |           |           |           | ○         |           |
| 5:15404119  | -                      | Intergenic        | L, B  |      | ○□   |      |      |      | ○    | ○    |      |      |           |           |           |           |           |           |           |           |           |           |           |
| 6:6056198   | -                      | Intergenic        | L, B  |      |      | □    | □    |      |      | ○    |      |      |           |           |           |           |           |           |           |           |           |           |           |
| Total loci  |                        |                   |       | 31   | 40   | 8    | 13   | 20   | 40   | 35   | 27   | 2    | 19        | 33        | 8         | 18        | 3         | 0         | 13        | 2         | 17        | 4         |           |

\*S, L, and B indicates that the SNP was identified by Samβada (S), LFMM (L), and Bayenv 2 (B) to be correlated with climate variables. The top five SNPs were identified by all three models (S, L, and B).

\*\*△, ○, or/and □ indicates a given climate variable was detected by Samβada, LFMM, or/and Bayenv 2 to be associated with the corresponding SNP on the left column.

Gene with reference number indicate those genes being previously documented as having temperature-related functions.



**Supplementary Table 3. Logistic regression analysis of survival responses of both sexes of wild-type (WT, G88) and *PxCad*-deficient mutant (MU, G88-Cad) strains to cold-shock treatments. Equation:  $\log[p/(1-p)] = a + b t$  where  $t$  is duration (min). Wald  $\chi^2$  statistic.**

| Source              | DF      | -14°C                |         | -17°C               |         | -20°C              |         |
|---------------------|---------|----------------------|---------|---------------------|---------|--------------------|---------|
|                     |         | $\chi^2$             | P       | $\chi^2$            | P       | $\chi^2$           | P       |
| Regression          | 7       | 194.9                | < 0.001 | 322.06              | < 0.001 | 290.75             | < 0.001 |
| Duration            | 1       | 60.51                | < 0.001 | 82.58               | < 0.001 | 78.57              | < 0.001 |
| Strain              | 1       | 5.67                 | 0.017   | 15.81               | < 0.001 | 37.04              | < 0.001 |
| Sex                 | 1       | 3.90                 | 0.048   | 0.03                | 0.856   | 0.74               | 0.391   |
| Duration×Strain     | 1       | 4.00                 | 0.045   | 0.15                | 0.695   | 31.29              | < 0.001 |
| Duration×Sex        | 1       | 19.36                | 0.002   | 0.25                | 0.619   | 0.79               | 0.374   |
| Strain×Sex          | 1       | 4.96                 | 0.026   | 0.55                | 0.458   | 2.42               | 0.120   |
| Duration×Strain×Sex | 1       | 9.74                 | 0.002   | 0.06                | 0.810   | 3.37               | 0.066   |
| Wild-type (WT)      | Males   | 4.181 – 0.01628 $t$  |         | 7.506 – 0.08923 $t$ |         | 16.07 – 0.5178 $t$ |         |
|                     | Females | 2.730 – 0.007566 $t$ |         | 7.729 – 0.08209 $t$ |         | 14.04 – 0.4495 $t$ |         |
| Mutant (MU)         | Males   | 2.511 – 0.01070 $t$  |         | 3.444 – 0.08324 $t$ |         | 4.397 – 0.1654 $t$ |         |
|                     | Females | 3.267 – 0.01425 $t$  |         | 4.773 – 0.08104 $t$ |         | 6.374 – 0.2541 $t$ |         |

**Supplementary Table 4. Logistic regression analysis of survival responses of both sexes of wild-type (WT, G88) and *PxCad*-deficient mutant (MU, G88-Cad) strains to heat-shock treatments. Equation:  $\log[p/(1-p)] = a + b T$  where  $T$  is temperature (°C). Wald  $\chi^2$  statistic. Parameter values estimates for both sexes pooled.**

| Source                 | DF              | $\chi^2$          | P       |
|------------------------|-----------------|-------------------|---------|
| Regression             | 7               | 370.56            | < 0.001 |
| Temperature            | 1               | 94.37             | < 0.001 |
| Strain                 | 1               | 4.79              | 0.029   |
| Sex                    | 1               | 0.21              | 0.647   |
| Temperature×Strain     | 1               | 5.03              | 0.025   |
| Temperature×Sex        | 1               | 0.23              | 0.629   |
| Strain×Sex             | 1               | 0.32              | 0.571   |
| Temperature×Strain×Sex | 1               | 0.34              | 0.557   |
| Wild-type (WT)         | Males & females | 86.71 - 2.081 $T$ |         |
| Mutant (MU)            | Males & females | 114.2 - 2.759 $T$ |         |

**Supplementary Table 5. Pairwise Pearson correlation coefficient between climate variables.**

|       | Bio01 | Bio02 | Bio03 | Bio04 | Bio05 | Bio06 | Bio07 | Bio08 | Bio09 | Bio10 | Bio11 | Bio12 | Bio13 | Bio14 | Bio15 | Bio16 | Bio17 | Bio18 | Bio19 |
|-------|-------|-------|-------|-------|-------|-------|-------|-------|-------|-------|-------|-------|-------|-------|-------|-------|-------|-------|-------|
| Bio01 | -     | -0.09 | 0.49  | -0.48 | 0.67  | 0.86  | -0.41 | 0.77  | 0.65  | 0.80  | 0.92  | 0.39  | 0.45  | 0.14  | 0.21  | 0.45  | 0.14  | 0.35  | 0.16  |
| Bio02 |       | -     | -0.02 | 0.37  | 0.44  | -0.44 | 0.67  | 0.09  | -0.20 | 0.14  | -0.24 | -0.43 | -0.29 | -0.35 | 0.37  | -0.32 | -0.37 | -0.21 | -0.40 |
| Bio03 |       |       | -     | -0.87 | -0.09 | 0.69  | -0.70 | 0.31  | 0.40  | -0.05 | 0.73  | 0.44  | 0.32  | 0.33  | 0.03  | 0.36  | 0.34  | 0.24  | 0.42  |
| Bio04 |       |       |       | -     | 0.29  | -0.82 | 0.93  | -0.22 | -0.47 | 0.14  | -0.79 | -0.44 | -0.36 | -0.27 | -0.04 | -0.40 | -0.28 | -0.24 | -0.40 |
| Bio05 |       |       |       |       | -     | 0.20  | 0.40  | 0.67  | 0.28  | 0.94  | 0.33  | -0.01 | 0.15  | -0.13 | 0.29  | 0.11  | -0.15 | 0.15  | -0.21 |
| Bio06 |       |       |       |       |       | -     | -0.82 | 0.57  | 0.65  | 0.41  | 0.97  | 0.53  | 0.50  | 0.30  | 0.05  | 0.52  | 0.30  | 0.36  | 0.37  |
| Bio07 |       |       |       |       |       |       | -     | -0.14 | -0.45 | 0.17  | -0.71 | 0.50  | -0.38 | -0.36 | 0.12  | -0.42 | -0.37 | -0.25 | -0.47 |
| Bio08 |       |       |       |       |       |       |       | -     | 0.07  | 0.70  | 0.63  | 0.36  | 0.46  | 0.11  | 0.25  | 0.45  | 0.10  | 0.51  | -0.04 |
| Bio09 |       |       |       |       |       |       |       |       | -     | 0.43  | 0.68  | 0.17  | 0.16  | 0.05  | 0.05  | 0.17  | 0.06  | -0.06 | 0.29  |
| Bio10 |       |       |       |       |       |       |       |       |       | -     | 0.49  | 0.13  | 0.24  | -0.02 | 0.18  | 0.22  | -0.04 | 0.19  | -0.08 |
| Bio11 |       |       |       |       |       |       |       |       |       |       | -     | 0.47  | 0.47  | 0.22  | 0.15  | 0.49  | 0.22  | 0.33  | 0.30  |
| Bio12 |       |       |       |       |       |       |       |       |       |       |       | -     | 0.84  | 0.79  | -0.32 | 0.88  | 0.81  | 0.80  | 0.70  |
| Bio13 |       |       |       |       |       |       |       |       |       |       |       |       | -     | 0.38  | 0.13  | 0.99  | 0.41  | 0.86  | 0.38  |
| Bio14 |       |       |       |       |       |       |       |       |       |       |       |       |       | -     | -0.69 | 0.44  | 1.00  | 0.48  | 0.80  |
| Bio15 |       |       |       |       |       |       |       |       |       |       |       |       |       |       | -     | 0.07  | -0.70 | 0.01  | -0.51 |
| Bio16 |       |       |       |       |       |       |       |       |       |       |       |       |       |       |       | -     | 0.47  | 0.87  | 0.43  |
| Bio17 |       |       |       |       |       |       |       |       |       |       |       |       |       |       |       |       | -     | 0.50  | 0.80  |
| Bio18 |       |       |       |       |       |       |       |       |       |       |       |       |       |       |       |       |       | -     | 0.28  |
| Bio19 |       |       |       |       |       |       |       |       |       |       |       |       |       |       |       |       |       |       | -     |

**Supplementary Table 6. Description of CLIMEX indices and parameters used for prediction of habitat suitability of diamondback moth.**

| Index          | Parameters | Description                                                                                                | Value           |
|----------------|------------|------------------------------------------------------------------------------------------------------------|-----------------|
| Temperature    | DV0        | Limiting low temperature                                                                                   | 7°C             |
|                | DV1        | Lower optimal temperature                                                                                  | 14°C            |
|                | DV2        | Upper optimal temperature                                                                                  | 28°C            |
|                | DV3        | Limiting high temperature                                                                                  | 38°C            |
|                | PDD        | Degree-days per generation                                                                                 | 268 Degree Days |
| Moisture       | SM0        | Limiting low soil moisture                                                                                 | 0.05%           |
|                | SM1        | Lower optimal soil moisture                                                                                | 0.5%            |
|                | SM2        | Upper optimal soil moisture                                                                                | 1.25%           |
|                | SM3        | Limiting high soil moisture                                                                                | 1.75%           |
|                | DTCS       | Threshold number of degree-days below DV0 at which cold stress begins to accumulate.                       | 12 Degree Days  |
| Cold stress    | DHCS       | Rate at which cold stress accumulates when the threshold number of degree-days below DV0 (DTCS) is reached | -0.0005         |
|                | TTCS       | Cold stress temperature threshold                                                                          | 4°C             |
|                | THCS       | Cold stress temperature rate                                                                               | -0.0005/°C/day  |
|                | TTHS       | Heat stress temperature threshold                                                                          | 38°C            |
|                | THHS       | Heat stress temperature rate                                                                               | 0.001/°C/day    |
| Heat stress    | DTHS       | Threshold number of degree-days above DV3 at which heat stress begins to accumulate.                       | 1 Degree Days   |
|                | DHHS       | Rate at which heat stress accumulates when the threshold number of degree-days above DV0 (DTHS) is reached | 0.005           |
|                | SMDS       | Dry stress threshold                                                                                       | 0.05%           |
| Dry stress     | HDS        | Dry stress rate                                                                                            | -0.005/day      |
|                | SMWS       | Wet stress threshold                                                                                       | 1.75%           |
| Wet stress     | HWS        | Wet stress rate                                                                                            | 0.05/day        |
|                | TTHW       | Temperature at which hot-wet stress begins                                                                 | 32°C            |
| Hot-Wet stress | MTHW       | Soil moisture at which hot-wet stress begins                                                               | 1.25%           |
|                | PHW        | Rate at which hot-wet stress accumulates once Tmax > TTHW & soil moisture > MTHW                           | 0.05            |

**Supplementary Table 7. Primers used for *PxCad* study.**

| <b>Primer</b> | <b>Sequence (5'-3')</b>                                                                       | <b>Direction</b> | <b>Application</b>                                                                                        |
|---------------|-----------------------------------------------------------------------------------------------|------------------|-----------------------------------------------------------------------------------------------------------|
| Cad-sg1_F     | 5'-TAATACGACTCACTATAGG <u>AGGGAGATGTCATCATTGC</u><br><u>AGTTTTAGAGCTAGAAATAGCAAGTTAA</u> -3'* | Sense            | PCR amplification of the template for <i>in vitro</i> transcription of the sgRNA of Cad-sg1.              |
| Cad-sg2_F     | 5'-TAATACGACTCACTATAGG <u>ACTCGTCCATGTAGATGTT</u><br><u>GGTTTTAGAGCTAGAAATAGCAAGTTAA</u> -3'* | Sense            | PCR amplification of the template for <i>in vitro</i> transcription of the sgRNA of Cad-sg2.              |
| sgRNA_comR    | 5'-AAAAGCACCGACTCGGTGCCACTTTTTCAAGTTGATA<br>ACGGACTAGCCTTATTTAACTTGCTATTTCTAGCTCTAA<br>AA-3'  | Antisense        | PCR amplification of the template for <i>in vitro</i> transcription of the sgRNAs of Cad-sg1 and Cad-sg2. |
| 8fPxCad       | 5'-CATCGGAYCCATGTCTCAG-3'                                                                     | Sense            | PCR amplification to detect the mutation generated by CRISPR/Cas9                                         |
| 7rPxCad       | 5'-TTCTGTGTAATGACGAGGTG-3'                                                                    | Antisense        | PCR amplification to detect the mutation generated by CRISPR/Cas9                                         |

\*Forward primer containing the T7 polymerase binding site and the underlined sgRNA target sequence.

## References

1. Huang, H. J. et al. Comparative analysis of the transcriptional responses to low and high temperatures in three rice planthopper species. *Mol. Ecol.* **26**, 2726-2737 (2017).
2. Liu, Y. C. et al. Comparative transcriptome analysis of *Glyphodes pyloalis* Walker (Lepidoptera: Pyralidae) reveals novel insights into heat stress tolerance in insects. *BMC Genomics* **18**, 974 (2017).
3. Lansdell, S. J., Schmitt, B., Betz, H., Sattelle, D. B., Millar, N. S. Temperature-sensitive expression of *Drosophila neuronal* nicotinic acetylcholine receptors. *J Neurochem* **68**, 1812-1819 (1997).
4. Nie, H. Y. et al. Transcriptome Analysis of neonatal larvae after hyperthermia-induced seizures in the contractile silkworm, *Bombyx mori*. *PloS One* **9**, e113214 (2014).
