# Supplementary material for: Large-scale genome-wide study reveals climate adaptive variability in a cosmopolitan pest
Source: PubMed Central journal article supplement (PMC8664911; doi:10.1038/s41467-021-27510-2), 2021-12-10
Supplement: 41467_2021_27510_MOESM3_ESM.pdf [file 41467_2021_27510_MOESM3_ESM.pdf]

## **Supplementary Data legends**

File Name: Supplementary Data 1

Description: Summary of the diamondback moth samples used for this study.

File Name: Supplementary Data 2

Description: Sequencing Statistics of 372 diamondback moth individuals.

File Name: Supplementary Data 3

Description: Identification of the SNPs associated with climate variables using Samβada.

File Name: Supplementary Data 4

Description: Identification of the SNPs associated with climate variables using LFMM.

File Name: Supplementary Data 5

Description: Identification of the SNPs associated with climate variables using Bayenv 2.
